# Supplementary material for: Ta2N3 nanocrystals grown in Al2O3 thin layers
Source: publisher site journal article supplement (doi:10.3762/bjnano.8.215), 2017-10-16
Supplement: Additional file 1 [file 2190-4286-8-215-S1.pdf]

## **Supporting Information**

for

### **Ta<sub>2</sub>N<sub>3</sub> nanocrystals grown in Al<sub>2</sub>O<sub>3</sub> thin layers**

Krešimir Salamon\*<sup>1</sup>, Maja Buljan<sup>1</sup>, Iva Šarić<sup>2</sup>, Mladen Petravić<sup>2</sup> and Sigrid Bernstorff<sup>3</sup>

Address: <sup>1</sup>Rudjer Bošković Institute, Bijenička cesta 54, HR-10000 Zagreb, Croatia;

<sup>2</sup>Department of Physics and Center for Micro- and Nanosciences and Technologies,

University of Rijeka, R. Matejčić 2, 51000 Rijeka, Croatia and <sup>3</sup>Elettra-Sincrotrone Trieste,

Strada Statale 14, km 163.5, I-34149 Basovizza (TS), Italy

Email: Krešimir Salamon\* - ksalamon@irb.hr

\*Corresponding author

### **Additional experimental data**

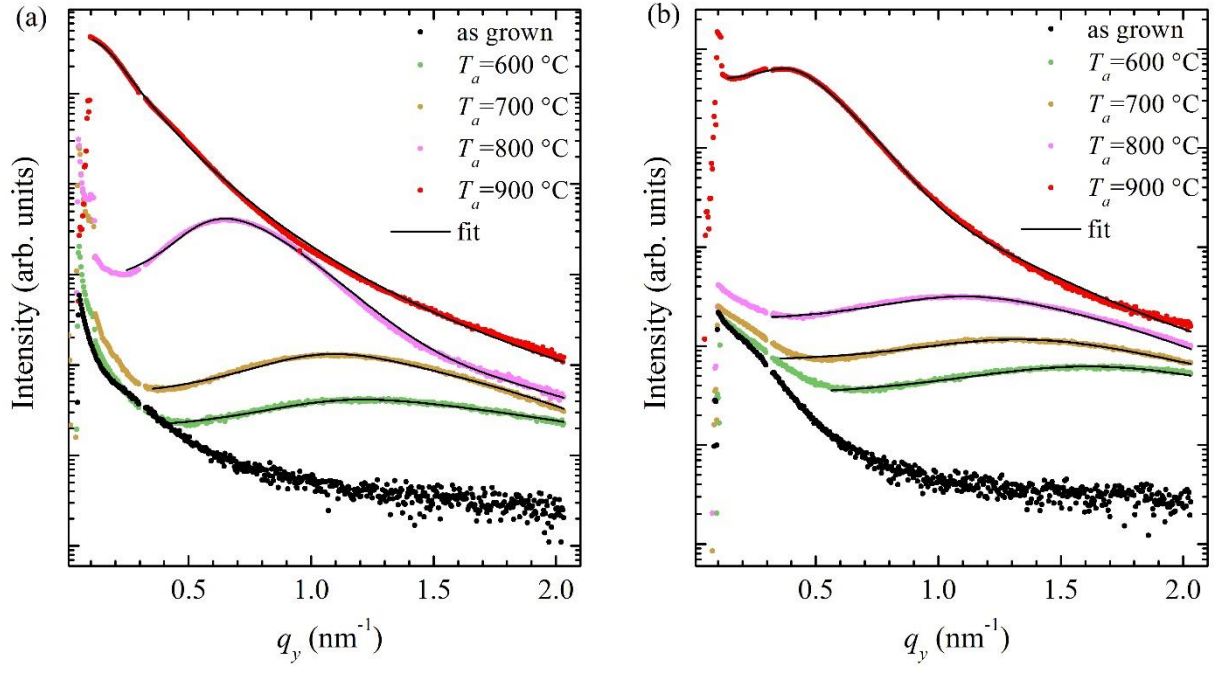

**Figure S1:** 1D intensity cross sections taken from the GISAXS patterns (shown in Figure 1) along the  $q_y$  axis (constant  $q_z=0.46 \text{ nm}^{-1}$ ) of as grown and annealed multilayers with (a) thinner (4 nm) and (b) thicker (12 nm) metallic layers. The spectra are vertically shifted for clarity. Solid lines represent best fits to the experimental data.

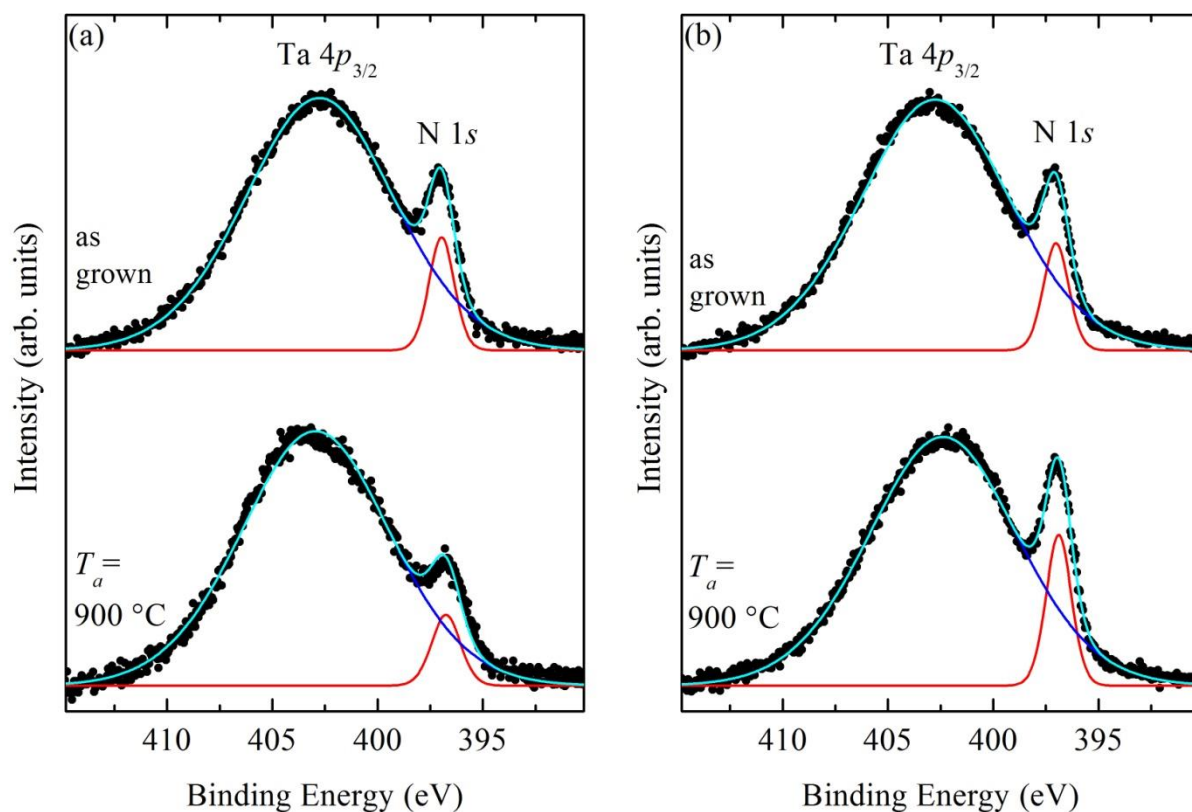

**Figure S2:** Deconvoluted XPS spectra for Ta 4p and N 1s core levels of the samples shown in Figure 5 of the main text: as grown (upper curves) and annealed at 900 °C (lower curves) MLs for two different nominal thicknesses of the metallic layers: (a) 4 nm (b) 12 nm. The location of N 1s energy level at BE of 397.2 eV implies the formation of N-Ta bonds [1].

## References

- [1] Lehn, J.-S. M.; van der Heide, P.; Wang, Y.; Suh, S.; Hoffman, D. M. *J. Mater. Chem.* **2004**, *14*, 3239–3245.
